# Supplementary material for: Retention Behavior of Anticancer Thiosemicarbazides in Biomimetic Chromatographic Systems and In Silico Calculations
Source: MDPI journal article supplement (doi:10.3390/molecules28207107), 2023-10-16
Supplement: s1 [file s1]

# Retention Behavior of Anticancer Thiosemicarbazides in Biomimetic Chromatographic Systems and In Silico Calculations

Marek Studziński <sup>1</sup>, Paweł Kozyra <sup>2</sup>, Monika Pitucha <sup>2</sup>, Bogusław Senczyna <sup>3</sup> and Joanna Matysiak <sup>3,\*</sup>

1 Department of Physical Chemistry, Institute of Chemical Sciences, Faculty of Chemistry, Maria Curie-Skłodowska University, 20-031 Lublin, Poland; marek.studzinski@umcs.pl

2 Independent Radiopharmacy Unit, Medical University of Lublin, Chodzki 4a, PL-20093 Lublin, Poland; pawelkozyra@umlub.pl (P.K.); monikapitucha@umlub.pl (M.P.)

3 Department of Chemistry, University of Life Sciences in Lublin, Akademicka 15, 20-950 Lublin, Poland; boguslaw.senczyna@up.lublin.pl

\* Correspondence: joanna.matysiak@up.lublin.pl; Tel.: +48-814456816

Table S1. Log k values for all mobile phase compositions studied (MeOH/H<sub>2</sub>O, v/v) on C 18 stationary phase

| v/v, MeOH<br>compound | 0.90   | 0.80   | 0.70   | 0.60   | 0.50   | 0.40  |
|-----------------------|--------|--------|--------|--------|--------|-------|
| 1.                    | -1.542 | -1.263 | -0.841 | -0.508 | -0.153 | 0.359 |
| 2.                    | -1.919 | -1.346 | -0.927 | -0.530 | -0.161 | 0.342 |
| 3.                    | -1.743 | -1.202 | -0.711 | -0.327 | 0.095  | 0.574 |
| 4.                    | -1.477 | -1.100 | -0.579 | -0.147 | 0.244  | 0.723 |
| 5.                    | -1.919 | -1.343 | -0.820 | -0.406 | 0.017  | 0.537 |
| 6.                    | -1.624 | -1.094 | -0.579 | -0.178 | 0.288  | 0.864 |
| 7.                    | -1.526 | -0.986 | -0.541 | -0.109 | 0.367  | 0.967 |
| 8.                    | -1.446 | -0.948 | -0.463 | -0.022 | 0.464  | 1.094 |
| 9.                    | -1.665 | -1.491 | -0.817 | -0.455 | -0.063 | 0.415 |
| 10.                   | -1.433 | -1.029 | -0.573 | -0.171 | 0.311  | 0.842 |
| 11.                   | -1.367 | -0.986 | -0.507 | -0.091 | 0.386  | 0.959 |
| 12.                   | -1.323 | -0.934 | -0.416 | 0.009  | 0.500  | 1.116 |
| 13.                   | -1.496 | -0.901 | -0.344 | 0.107  | 0.558  | 1.164 |
| 14.                   | -1.421 | -0.769 | -0.190 | 0.319  | 0.854  | -     |
| 15.                   | -1.446 | -0.881 | -0.316 | 0.171  | 0.694  | -     |
| 16.                   | -      | -1.336 | -0.976 | -0.443 | 0.074  | 0.732 |
| 17.                   | -1.538 | -1.063 | -0.633 | -0.142 | 0.364  | 0.788 |
| 18.                   | -1.547 | -1.058 | -0.626 | -0.126 | 0.292  | 0.827 |

Table S2. Log k values for all mobile phase compositions (ACN/H<sub>2</sub>O, v/v) studied on IAM stationary phase

| v/v ACN<br>compound | 0.40   | 0.35   | 0.30   | 0.25   | 0.20  | 0.15  | 0.10  | 0.05  |
|---------------------|--------|--------|--------|--------|-------|-------|-------|-------|
| 1.                  | -0.556 | -0.490 | -0.518 | -0.142 | 0.085 | 0.284 | 0.548 | 0.999 |
| 2.                  | -      | -0.461 | -0.358 | -0.010 | 0.234 | 0.455 | 0.692 | 0.968 |
| 3.                  | -      | -0.209 | -0.138 | 0.291  | 0.515 | 0.794 | 1.022 | -     |
| 4.                  | -      | -0.138 | -0.029 | 0.451  | 0.642 | 0.893 | 1.158 | -     |
| 5.                  | -      | -0.441 | -0.274 | 0.024  | 0.312 | 0.565 | 0.876 | 1.193 |
| 6.                  | -      | -0.247 | -0.082 | 0.333  | 0.647 | 0.982 | 1.270 | -     |
| 7.                  | -      | -0.196 | -0.038 | 0.413  | 0.777 | 1.120 | -     | -     |
| 8.                  | -0.404 | -0.074 | 0.088  | 0.573  | 0.952 | 1.304 | -     | -     |
| 9.                  | -      | -0.467 | -0.484 | -0.150 | 0.088 | 0.336 | 0.588 | 1.054 |
| 10.                 | -      | -0.210 | -0.038 | 0.368  | 0.673 | 1.009 | 1.235 | -     |
| 11.                 | -      | -0.111 | 0.004  | 0.453  | 0.792 | 1.141 | -     | -     |
| 12.                 | -0.358 | -0.016 | 0.141  | 0.655  | 0.951 | 1.352 | -     | -     |
| 13.                 | -0.430 | -0.103 | 0.067  | 0.557  | 0.870 | 1.240 | -     | -     |
| 14.                 | -0.366 | -0.027 | 0.154  | 0.710  | 1.133 | 1.494 | -     | -     |
| 15.                 | -0.346 | -0.062 | 0.158  | 0.667  | 1.032 | 1.542 | -     | -     |
| 16.                 | -      | -0.533 | -      | 0.016  | 0.253 | 0.590 | 0.964 | 1.287 |
| 17.                 | -      | -0.280 | -0.101 | 0.282  | 0.513 | 0.821 | 1.147 | -     |
| 18.                 | -      | -0.258 | -0.130 | 0.278  | 0.533 | 0.809 | 1.105 | -     |

Table S3. Log k values for all mobile phase compositions (studied MeOH/H<sub>2</sub>O, v/v) on Chol stationary phase

| v/v, MeOH<br>compound | 0.80   | 0.70   | 0.60   | 0.50   | 0.45  | 0.40  | 0.35  | 0.30  |
|-----------------------|--------|--------|--------|--------|-------|-------|-------|-------|
| 1.                    | -1.006 | -      | -0.157 | 0.110  | 0.440 | 0.620 | 0.857 | 0.979 |
| 2.                    | -1.104 | -      | -0.314 | -0.037 |       | 0.441 | 0.656 | 0.744 |
| 3.                    | -1.020 | -      | -0.068 | 0.198  | 0.461 | 0.759 | 0.917 | 1.024 |
| 4.                    | -0.938 | -      | -0.037 | 0.244  | 0.519 | 0.747 | 0.974 | 1.105 |
| 5.                    | -1.065 | -      | -0.057 | 0.184  | 0.487 | 0.699 | 0.957 | -     |
| 6.                    | -0.975 | -      | 0.160  | 0.422  | 0.766 | 1.016 | 1.270 | -     |
| 7.                    | -0.987 | -0.309 | 0.347  | 0.720  | 0.913 | 1.284 | -     | -     |
| 8.                    | -0.984 | -0.165 | 0.522  | 0.834  | 1.026 | 1.443 | -     | -     |
| 9.                    | -0.997 | -      | -0.078 | 0.179  | 0.523 | 0.696 | 0.970 | 1.111 |
| 10.                   | -0.946 | -0.396 | 0.206  | 0.479  | 0.836 | 1.050 | 1.331 | 1.475 |
| 11.                   | -0.886 | -      | 0.276  | 0.571  | 0.871 | 1.158 | 1.437 | -     |
| 12.                   | -0.783 | -0.214 | 0.404  | 0.685  | 1.049 | 1.303 | -     | -     |
| 13.                   | -1.016 | -0.329 | 0.400  | 0.627  | 0.978 | 1.246 | -     | -     |
| 14.                   | -0.783 | -0.138 | 0.574  | 0.716  | 1.095 | -     | -     | -     |
| 15.                   | -0.876 | -0.087 | 0.792  | 1.013  | 1.349 | -     | -     | -     |
| 16.                   | -      | -      | -0.189 | 0.093  | 0.478 | 0.843 | 1.082 | 1.264 |
| 17.                   | -0.975 | -0.316 | 0.379  | 0.510  | 0.878 | 1.108 | 1.434 | -     |
| 18.                   | -1.016 | -      | 0.062  | 0.405  | 0.758 | 1.025 | 1.296 | 1.494 |
